# Supplementary material
Source: Elsevier journal article supplement (https://comptes-rendus.academie-sciences.fr/chimie/article/10.1016/j.crci.2007.02.002/file/attach/mmc3.pdf)
Supplement: mmc3 [file mmc3.pdf]

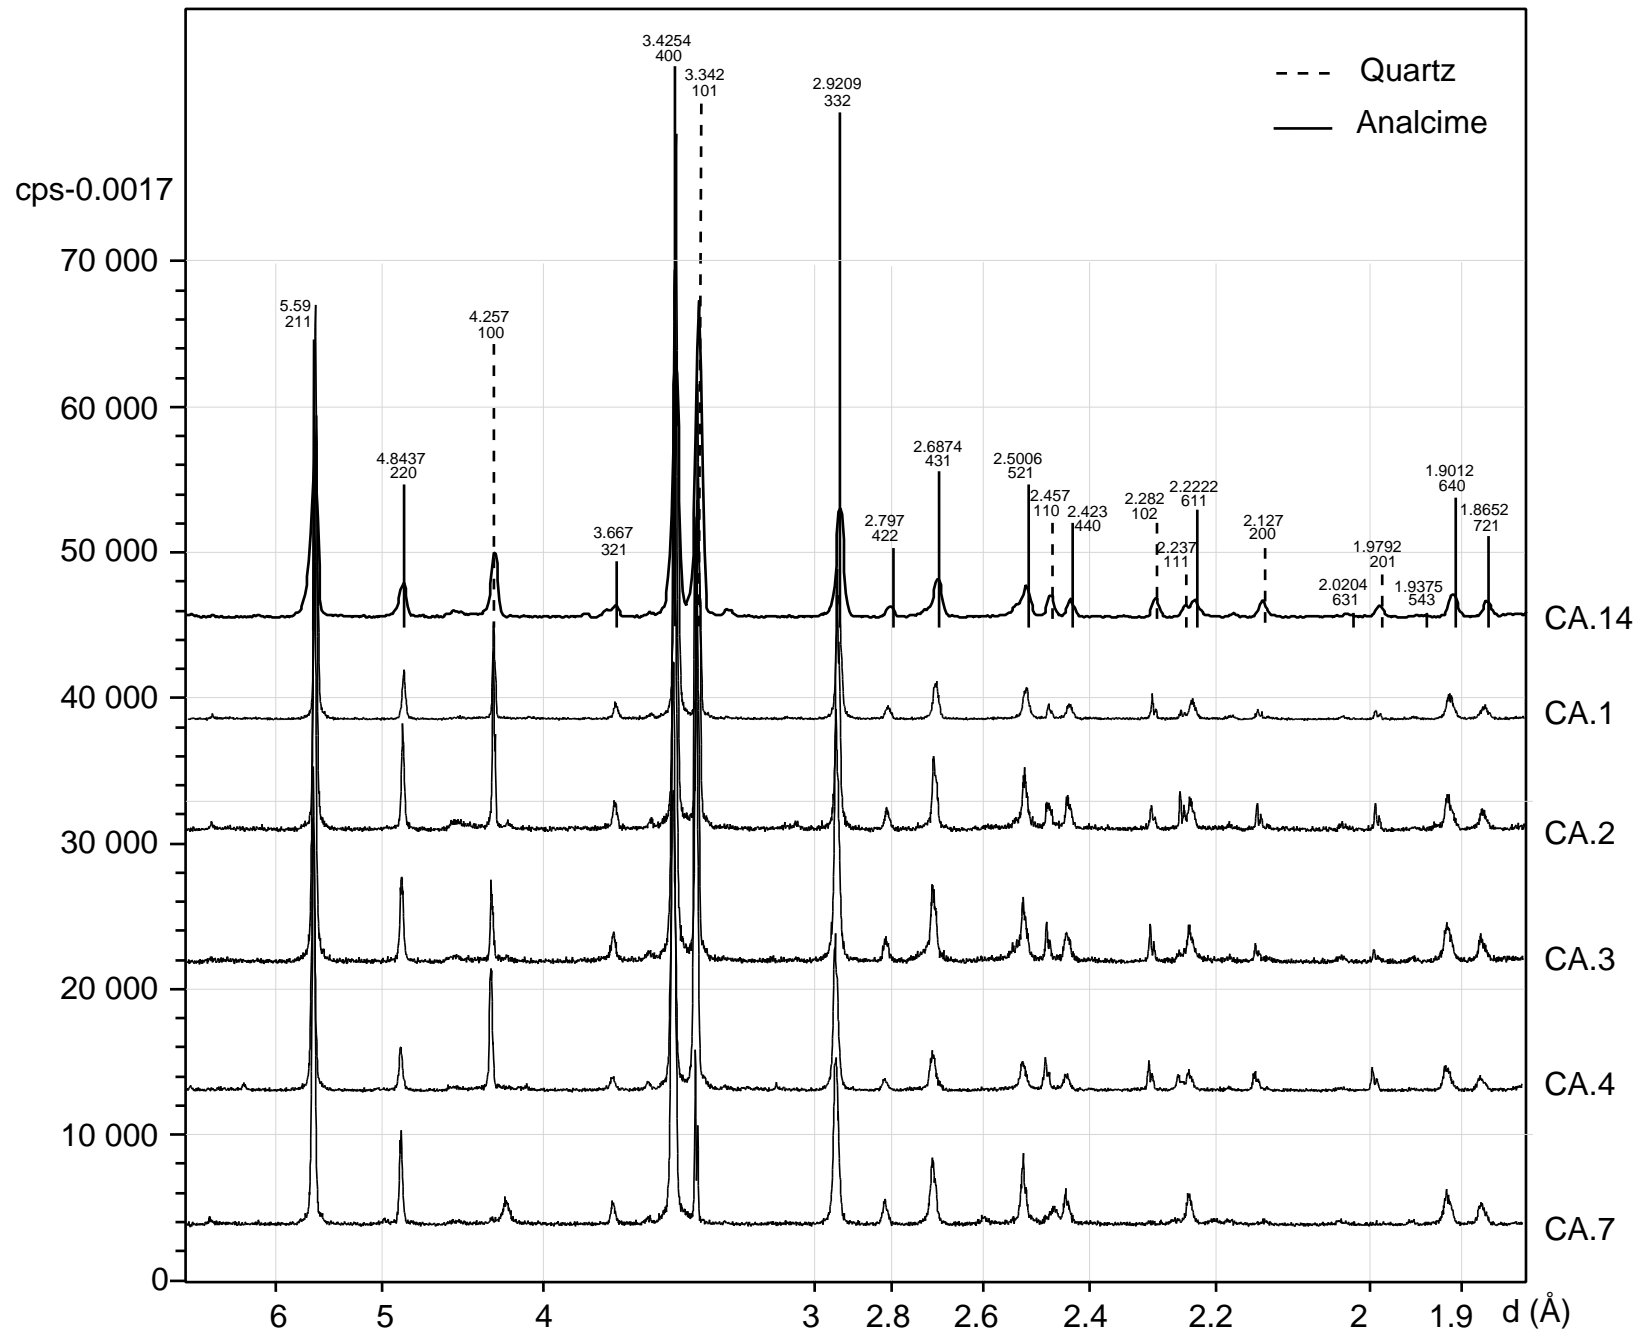

Figure S-3.a : Diffractogrammes DRX des échantillons contenant essentiellement de l'analcime et du quartz.
